# Supplementary material
Source: PubMed Central journal article supplement (PMC2423126)
Supplement: supp_28_12_3917__1.pdf [file supp_28_12_3917__1.pdf]

### Supplemental Data

**Supplemental table 1** Genes down-regulated in livers of hepatic HNF4 $\alpha$ -null mice

| Description                                                                    | Accession Number | Average fold change (2 <sup>n</sup> ) |
|--------------------------------------------------------------------------------|------------------|---------------------------------------|
| major urinary protein 1                                                        | AK011413         | -8.3                                  |
| hydroxysteroid dehydrogenase-5, delta<5>-3-beta                                | NM_008295        | -8.0                                  |
| apolipoprotein A-IV *                                                          | BC010769         | -7.9                                  |
| serine (or cysteine) proteinase inhibitor, clade A, member 3K                  | BF234005         | -7.9                                  |
| solute carrier organic anion transporter family, member 1a1                    | AB031813         | -7.6                                  |
| serine (or cysteine) proteinase inhibitor, clade A, member 4, pseudogene 1     | BF383739         | -7.5                                  |
| elongation of very long chain fatty acids (FEN1/Elo2, SUR4/Elo3, yeast)-like 3 | BC016468         | -7.2                                  |
| ESTs                                                                           | BI329779         | -7.1                                  |
| complement component 8, alpha polypeptide **                                   | BC027748         | -7.0                                  |
| hydroxysteroid dehydrogenase-2, delta<5>-3-beta **                             | BC026757         | -6.5                                  |
| RIKEN cDNA 1100001G20 gene                                                     | AV006463         | -6.3                                  |
| apolipoprotein M **                                                            | NM_018816        | -6.2                                  |
| cis-retinol/3alpha hydroxysterol short-chain dehydrogenase-like                | BC018263         | -6.1                                  |
| 0610012Dio14Rik **                                                             | BC019451         | -6.0                                  |
| cytidine monophospho-N-acetylneuraminic acid hydroxylase                       | AB061276         | -6.0                                  |
| Retinoic acid receptor responder (tazarotene induced) 1                        | BB035017         | -6.0                                  |
| esterase 31-like                                                               | BC019147         | -5.8                                  |

|                                                        |           |      |
|--------------------------------------------------------|-----------|------|
| cytochrome P450, 2c37 (Cyp2c37)                        | AI256046  | -5.8 |
| major urinary protein 3                                | M16359    | -5.6 |
| kidney expressed gene 1                                | NM_029550 | -5.6 |
| 3-hydroxyanthranilate 3,4-dioxygenase **               | AK002295  | -5.6 |
| Interleukin 1 receptor accessory protein **            | BB653614  | -5.4 |
| ectonucleotide pyrophosphatase/phosphodiesterase 3     | AV224446  | -5.3 |
| deiodinase, iodothyronine, type I                      | NM_007860 | -5.3 |
| cytochrome P450, family 2, subfamily a, polypeptide 12 | NM_133657 | -5.2 |
| UDP glycosyltransferases 3 family, polypeptide A2      | BC022134  | -5.2 |
| cytochrome P450, family 7, subfamily b, polypeptide 1  | NM_007825 | -5.1 |
| Rho GTPase activating protein 9                        | AU043488  | -5.1 |
| NADPH oxidase 4                                        | BC021378  | -5.1 |
| hydroxyacid oxidase 1, liver **                        | NM_010403 | -5.1 |
| ESTs                                                   | AI527293  | -5.1 |
| cytochrome P450, family 2, subfamily c, polypeptide 50 | NM_134144 | -5.0 |
| bile acid-Coenzyme A: amino acid N-acyltransferase *   | NM_007519 | -4.9 |
| ESTs                                                   | BM245957  | -4.8 |
| hydroxysteroid dehydrogenase-2, delta<5>-3-beta ///    | NM_013821 | -4.7 |
| hydroxysteroid dehydrogenase-6, delta<5>-3-beta **     |           |      |
| PERP, TP53 apoptosis effector                          | NM_022032 | -4.6 |

RNA from control (FLOX) or hepatic HNF4 $\alpha$ -null (H4LivKO) mice liver (n = 3) were hybridized onto Affymetrix oligonucleotide arrays and quantified. The average fold change (2<sup>n</sup>-fold) is expressed relative to FLOX mice. A gene was classified as down-regulated if the following three criteria were met: 1) the corresponding ratio was

less than  $2^{-4.4}$ ; 2) the average difference of gene in FLOX mice liver was greater than 100; and 3) all samples in FLOX mice liver represented as 'presence'. Using the Mann-Whitney ranking feature of the Affymetrix software as criteria for statistical significance, we identified 45 probe sets (36 genes) as decreased in H4LivKO mice liver. \* Genes previously characterized as directly regulated by HNF4 $\alpha$ . \*\* Genes previously reported to be down-regulated in HNF4 $\alpha$  null embryonic livers (4).

**Supplemental Table 2** Genes Down regulated in hepatic HNF4a-null (H4LivKO) mice liver

| Probe set    | fold change (2 <sup>n</sup> ) | Accession No. | Description                                                                    |
|--------------|-------------------------------|---------------|--------------------------------------------------------------------------------|
| 1430893_at   | -8.3                          | AK011413      | major urinary protein 1                                                        |
| 1420531_at   | -8.0                          | NM_008295     | hydroxysteroid dehydrogenase-5, delta<5>-3-beta                                |
| 1417761_at   | -7.9                          | BC010769      | apolipoprotein A-IV                                                            |
| 1423867_at   | -7.9                          | BF234005      | serine (or cysteine) proteinase inhibitor, clade A, member 3K                  |
| 1420379_at   | -7.6                          | AB031813      | solute carrier organic anion transporter family, member 1a1                    |
| 1444297_at   | -7.5                          | BF383739      | serine (or cysteine) proteinase inhibitor, clade A, member 4, pseudogene 1     |
| 1444296_a_at | -7.3                          | BF383739      | serine (or cysteine) proteinase inhibitor, clade A, member 4, pseudogene 1     |
| 1420722_at   | -7.2                          | BC016468      | elongation of very long chain fatty acids (FEN1/Elo2, SUR4/Elo3, yeast)-like 3 |
| 1457263_at   | -7.1                          | BI329779      | ESTs                                                                           |
| 1439260_a_at | -7.1                          | BB039510      | ectonucleotide pyrophosphatase/phosphodiesterase 3                             |
| 1428012_at   | -7.0                          | BC027748      | complement component 8, alpha polypeptide                                      |
| 1449844_at   | -7.0                          | AB031813      | solute carrier organic anion transporter family, member 1a1                    |
| 1436504_x_at | -6.6                          | AV027367      | apolipoprotein A-IV                                                            |
| 1425127_at   | -6.5                          | BC026757      | hydroxysteroid dehydrogenase-2, delta<5>-3-beta                                |
| 1448092_x_at | -6.5                          | AA267743      | serine (or cysteine) proteinase inhibitor, clade A, member 4, pseudogene 1     |
| 1419001_at   | -6.4                          | NM_007519     | bile acid-Coenzyme A: amino acid N-acyltransferase                             |
| 1434484_at   | -6.3                          | AV006463      | RIKEN cDNA 1100001G20 gene                                                     |
| 1419095_a_at | -6.2                          | NM_018816     | apolipoprotein M                                                               |
| 1451681_at   | -6.1                          | BC018263      | cis-retinol/3alpha hydroxysterol short-chain dehydrogenase-like                |
| 1425117_at   | -6.0                          | BC019451      | RIKEN cDNA 0610012D14 gene                                                     |
| 1428043_a_at | -6.0                          | AB061276      | cytidine monophospho-N-acetylneuraminic acid hydroxylase                       |
| 1438055_at   | -6.0                          | BB035017      | retinoic acid receptor responder (tazarotene induced) 1                        |
| 1421214_at   | -5.9                          | NM_007717     | cytidine monophospho-N-acetylneuraminic acid hydroxylase                       |
| 1451600_s_at | -5.8                          | BC019147      | esterase 31-like                                                               |
| 1455457_at   | -5.8                          | AI256046      | cytochrome P450, 2c37                                                          |
| 1434110_x_at | -5.8                          | BF322785      | major urinary protein 1                                                        |
| 1427631_x_at | -5.6                          | M16359        | major urinary protein 3                                                        |
| 1416833_at   | -5.6                          | NM_029550     | kidney expressed gene 1                                                        |

|              |      |           |                                                                                                     |
|--------------|------|-----------|-----------------------------------------------------------------------------------------------------|
| 1432492_a_at | -5.6 | AK002295  | 3-hydroxyanthranilate 3,4-dioxygenase                                                               |
| 1419096_at   | -5.5 | NM_018816 | apolipoprotein M                                                                                    |
| 1426154_s_at | -5.5 | M27608    | major urinary protein 3 /// major urinary protein 1                                                 |
| 1457601_at   | -5.4 | BB653614  | interleukin 1 receptor accessory protein                                                            |
| 1448792_a_at | -5.3 | NM_007817 | cytochrome P450, family 2, subfamily f, polypeptide 2                                               |
| 1417991_at   | -5.3 | NM_007860 | deiodinase, iodothyronine, type 1                                                                   |
| 1427302_at   | -5.3 | AV224446  | ectonucleotide pyrophosphatase/phosphodiesterase 3                                                  |
| 1422815_at   | -5.3 | NM_013485 | complement component 9                                                                              |
| 1418821_at   | -5.2 | NM_133657 | cytochrome P450, family 2, subfamily a, polypeptide 12                                              |
| 1423397_at   | -5.2 | AI118428  | RIKEN cDNA 9430041C03 gene                                                                          |
| 1425365_a_at | -5.2 | BC018344  | cytochrome P450, family 2, subfamily d, polypeptide 13                                              |
| 1419094_at   | -5.2 | NM_010001 | cytochrome P450, 2c37 (Cyp2c37)                                                                     |
| 1423968_at   | -5.2 | BC022134  | expressed sequence AI313915                                                                         |
| 1421075_s_at | -5.1 | NM_007825 | cytochrome P450, family 7, subfamily b, polypeptide 1                                               |
| 1449619_s_at | -5.1 | AU043488  | Rho GTPase activating protein 9                                                                     |
| 1451827_a_at | -5.1 | BC021378  | NADPH oxidase 4                                                                                     |
| 1420420_at   | -5.1 | NM_010403 | hydroxyacid oxidase 1, liver                                                                        |
| 1451488_at   | -5.1 | AB054000  | RIKEN cDNA 1110028A07 gene                                                                          |
| 1440921_at   | -5.1 | AI527293  | ESTs                                                                                                |
| 1424576_s_at | -5.0 | BC025819  | cDNA sequence BC034834                                                                              |
| 1437932_a_at | -5.0 | AV227581  | claudin 1                                                                                           |
| 1418653_at   | -5.0 | NM_134144 | expressed sequence AI266900 (AI266900)                                                              |
| 1419002_s_at | -4.9 | NM_007519 | bile acid-Coenzyme A: amino acid N-acyltransferase                                                  |
| 1421074_at   | -4.8 | NM_007825 | cytochrome P450, family 7, subfamily b, polypeptide 1                                               |
| 1418998_at   | -4.8 | NM_133809 | kynurenine 3-monooxygenase (kynurenine 3-hydroxylase)                                               |
| 1436039_at   | -4.8 | BM245957  | ESTs                                                                                                |
| 1427137_at   | -4.8 | BC022148  | carboxylesterase 5                                                                                  |
| 1436109_at   | -4.8 | BE980249  | expressed sequence AI317395                                                                         |
| 1460232_s_at | -4.7 | NM_013821 | hydroxysteroid dehydrogenase-2, delta<5>-3-beta /// hydroxysteroid dehydrogenase-6, delta<5>-3-beta |
| 1418438_at   | -4.7 | NM_007980 | fatty acid binding protein 2, intestinal                                                            |
| 1449309_at   | -4.7 | BC010973  | cytochrome P450, family 8, subfamily b, polypeptide 1                                               |
| 1425712_at   | -4.7 | BC025446  | cDNA sequence BC025446                                                                              |
| 1418766_s_at | -4.7 | BC028829  | T-cell immunoglobulin and mucin domain containing 2                                                 |

|              |      |           |                                                                                                                                                                                                                                                                    |
|--------------|------|-----------|--------------------------------------------------------------------------------------------------------------------------------------------------------------------------------------------------------------------------------------------------------------------|
| 1416271_at   | -4.6 | NM_022032 | PERP, TP53 apoptosis effector                                                                                                                                                                                                                                      |
| 1449242_s_at | -4.6 | NM_053176 | histidine-rich glycoprotein                                                                                                                                                                                                                                        |
| 1451460_a_at | -4.6 | BC026598  | solute carrier family 22 (organic anion transporter), member 7                                                                                                                                                                                                     |
| 1418765_at   | -4.6 | BC028829  | T-cell immunoglobulin and mucin domain containing 2                                                                                                                                                                                                                |
| 1449321_x_at | -4.6 | NM_009246 | serine (or cysteine) proteinase inhibitor, clade A, member 1b /// serine (or cysteine) proteinase inhibitor, clade A, member 1d /// serine (or cysteine) proteinase inhibitor, clade A, member 1a /// serine (or cysteine) proteinase inhibitor, clade A, member 1 |
| 1436615_a_at | -4.6 | AI786408  | ornithine transcarbamylase                                                                                                                                                                                                                                         |
| 1418940_at   | -4.5 | NM_019878 | sulfotransferase family 1B, member 1                                                                                                                                                                                                                               |
| 1431701_a_at | -4.5 | AK006269  | PDZ domain containing 1                                                                                                                                                                                                                                            |
| 1451373_at   | -4.5 | BC025940  | expressed sequence AI746432                                                                                                                                                                                                                                        |
| 1420525_a_at | -4.5 | NM_008769 | ornithine transcarbamylase                                                                                                                                                                                                                                         |
| 1425596_at   | -4.5 | BC018406  | similar to RIKEN cDNA 2010001E11 gene                                                                                                                                                                                                                              |
| 1451788_at   | -4.5 | AF356627  | coagulation factor XI                                                                                                                                                                                                                                              |
| 1417828_at   | -4.5 | NM_007474 | aquaporin 8                                                                                                                                                                                                                                                        |
| 1421092_at   | -4.4 | AK014346  | serine (or cysteine) proteinase inhibitor, clade A (alpha-1 antiproteinase, antitrypsin), member 12                                                                                                                                                                |
| 1454777_at   | -4.4 | BB553107  | solute carrier organic anion transporter family, member 2b1                                                                                                                                                                                                        |
| 1433408_a_at | -4.4 | AK010648  | minichromosome maintenance deficient 10 (S. cerevisiae)                                                                                                                                                                                                            |
| 1456074_at   | -4.4 | BB143568  | orphan short chain dehydrogenase/reductase                                                                                                                                                                                                                         |
| 1422070_at   | -4.4 | NM_011996 | alcohol dehydrogenase 4 (class II), pi polypeptide                                                                                                                                                                                                                 |
| 1430785_at   | -4.4 | BB150587  | orphan short chain dehydrogenase/reductase                                                                                                                                                                                                                         |
| 1420553_x_at | -4.4 | NM_009243 | serine (or cysteine) proteinase inhibitor, clade A, member 1a                                                                                                                                                                                                      |
| 1418923_at   | -4.4 | NM_134069 | solute carrier family 17 (sodium phosphate), member 3                                                                                                                                                                                                              |
| 1431803_at   | -4.3 | AK004933  | cytochrome P450, family 2, subfamily d, polypeptide 13                                                                                                                                                                                                             |
| 1417231_at   | -4.3 | NM_016675 | claudin 2                                                                                                                                                                                                                                                          |
| 1425300_at   | -4.3 | BC021917  | cDNA sequence BC021917                                                                                                                                                                                                                                             |
| 1438751_at   | -4.3 | BB736474  | RIKEN cDNA 130106K10 gene                                                                                                                                                                                                                                          |
| 1460509_at   | -4.3 | AK018190  | RIKEN cDNA 6330417G03 gene                                                                                                                                                                                                                                         |
| 1419319_at   | -4.3 | NM_011316 | serum amyloid A 4                                                                                                                                                                                                                                                  |
| 1433933_s_at | -4.3 | BB553107  | solute carrier organic anion transporter family, member 2b1                                                                                                                                                                                                        |
| 1441396_at   | -4.2 | AV328619  | ESTs                                                                                                                                                                                                                                                               |
| 1419614_at   | -4.2 | BC021592  | phospholipase A2, group XIIB                                                                                                                                                                                                                                       |

|              |      |           |                                                               |
|--------------|------|-----------|---------------------------------------------------------------|
| 1418395_at   | -4.2 | NM_026183 | RIKEN cDNA 1300013J15 gene                                    |
| 1431721_a_at | -4.2 | BC024104  | protein Z, vitamin K-dependent plasma glycoprotein            |
| 1448741_at   | -4.2 | NM_009205 | solute carrier family 3, member 1                             |
| 1428223_at   | -4.2 | AK006096  | RIKEN cDNA 1700018O18 gene                                    |
| 1452384_at   | -4.1 | AV224446  | ectonucleotide pyrophosphatase/phosphodiesterase 3            |
| 1426166_at   | -4.1 | M16360    | major urinary protein 5                                       |
| 1424867_a_at | -4.1 | BC010799  | glycine-N-acyltransferase                                     |
| 1429642_at   | -4.1 | AK012639  | AN1, ubiquitin-like, homolog ( <i>Xenopus laevis</i> )        |
| 1436162_at   | -4.1 | BB667865  | RIKEN cDNA C730048C13 gene                                    |
| 1418804_at   | -4.1 | NM_032400 | succinate receptor 1                                          |
| 1451625_a_at | -4.1 | BC019967  | RIKEN cDNA 1700013L23 gene                                    |
| 1421912_at   | -4.0 | AA276202  | solute carrier family 23 (nucleobase transporters), member 1  |
| 1428538_s_at | -4.0 | BI328146  | retinoic acid receptor responder (tazarotene induced) 2       |
| 1449585_at   | -4.0 | NM_134103 | interleukin 1 receptor accessory protein                      |
| 1419510_at   | -4.0 | NM_133660 | esterase 22                                                   |
| 1427377_x_at | -4.0 | M77015    | hydroxysteroid dehydrogenase-3, delta<sup>5</sup>-3-beta      |
| 1449112_at   | -4.0 | NM_009512 | solute carrier family 27 (fatty acid transporter), member 5   |
| 1424934_at   | -4.0 | BC027200  | RIKEN cDNA 1300012D20 gene                                    |
| 1430130_at   | -4.0 | BB212004  | RIKEN cDNA 1300015B04 gene                                    |
| 1428981_at   | -4.0 | AK012685  | RIKEN cDNA 2810007J24 gene                                    |
| 1450201_at   | -4.0 | NM_025834 | RIKEN cDNA 1300015B06 gene                                    |
| 1418916_a_at | -3.9 | NM_029269 | secreted phosphoprotein 2                                     |
| 1421921_at   | -3.9 | BC011158  | serine (or cysteine) proteinase inhibitor, clade A, member 3M |
| 1424352_at   | -3.9 | BC025936  | similar to cytochrome P450, 4a10                              |
| 1419349_a_at | -3.9 | BC010593  | cytochrome P450, family 2, subfamily d, polypeptide 9         |
| 1432099_a_at | -3.9 | AK011039  | proline dehydrogenase (oxidase) 2                             |
| 1424722_at   | -3.8 | BC021390  | RIKEN cDNA 1300017J02 gene                                    |
| 1437902_s_at | -3.8 | AV012073  | retinoic acid receptor responder (tazarotene induced) 2       |
| 1460420_a_at | -3.8 | AF277898  | epidermal growth factor receptor                              |
| 1450014_at   | -3.7 | NM_016674 | claudin 1                                                     |
| 1420496_at   | -3.7 | NM_021489 | coagulation factor XII (Hageman factor)                       |
| 1427337_at   | -3.7 | BC013511  | aldehyde dehydrogenase 8 family, member A1                    |
| 1421944_a_at | -3.7 | U09362    | asialoglycoprotein receptor 1                                 |
| 1417070_at   | -3.7 | NM_133969 | cytochrome P450, family 4, subfamily v, polypeptide 3         |

|              |      |           |                                                                                                                                |
|--------------|------|-----------|--------------------------------------------------------------------------------------------------------------------------------|
| 1428739_at   | -3.7 | BB772205  | RIKEN cDNA 2310040A07 gene                                                                                                     |
| 1437156_at   | -3.7 | BB392041  | EF hand calcium binding protein 1                                                                                              |
| 1426959_at   | -3.7 | BF322712  | 3-hydroxybutyrate dehydrogenase (heart, mitochondrial)                                                                         |
| 1419318_at   | -3.6 | NM_011316 | serum amyloid A 4                                                                                                              |
| 1435750_at   | -3.6 | BB610454  | GTP cyclohydrolase I feedback regulator                                                                                        |
| 1444691_at   | -3.6 | BB667397  | protein kinase C, nu                                                                                                           |
| 1451515_s_at | -3.6 | BC010799  | glycine-N-acyltransferase                                                                                                      |
| 1417071_s_at | -3.6 | NM_133969 | cytochrome P450, family 4, subfamily v, polypeptide 3                                                                          |
| 1427336_at   | -3.6 | BC013511  | aldehyde dehydrogenase 8 family, member A1                                                                                     |
| 1424493_s_at | -3.6 | BC025940  | expressed sequence AI746432                                                                                                    |
| 1448683_at   | -3.6 | NM_029562 | cytochrome P450, family 2, subfamily d, polypeptide 26                                                                         |
| 1426215_at   | -3.6 | AF071068  | aromatic-L-amino-acid decarboxylase                                                                                            |
| 1423866_at   | -3.6 | BF234005  | serine (or cysteine) proteinase inhibitor, clade A, member 3K                                                                  |
| 1450127_a_at | -3.6 | NM_008101 | glucagon receptor                                                                                                              |
| 1419436_at   | -3.6 | NM_015780 | complement component factor h-like 1                                                                                           |
| 1418976_s_at | -3.6 | NM_009894 | cell death-inducing DNA fragmentation factor, alpha subunit-like effector B                                                    |
| 1424245_at   | -3.6 | BC015290  | carboxylesterase 2                                                                                                             |
| 1424932_at   | -3.6 | U03425    | epidermal growth factor receptor                                                                                               |
| 1451547_at   | -3.6 | BC023358  | 0610009A07Rik                                                                                                                  |
| 1433579_at   | -3.5 | BG068678  | transmembrane protein 30B                                                                                                      |
| 1452893_s_at | -3.5 | BB772205  | RIKEN cDNA 2310040A07 gene /// RIKEN cDNA 1110065P19 gene                                                                      |
| 1425392_a_at | -3.5 | AF009328  | nuclear receptor subfamily 1, group I, member 3                                                                                |
| 1449308_at   | -3.5 | NM_016704 | complement component 6                                                                                                         |
| 1434091_at   | -3.5 | BB189927  | fatty acid amide hydrolase                                                                                                     |
| 1418853_at   | -3.5 | NM_133996 | DNA segment, Chr 10, University of California at Los Angeles 2                                                                 |
| 1419560_at   | -3.4 | NM_008280 | lipase, hepatic                                                                                                                |
| 1416762_at   | -3.4 | NM_009112 | S100 calcium binding protein A10 (calpactin)                                                                                   |
| 1429550_at   | -3.4 | AK008590  | ectonucleoside triphosphate diphosphohydrolase 8                                                                               |
| 1449375_at   | -3.4 | NM_133960 | carboxylesterase 6                                                                                                             |
| 1452257_at   | -3.4 | BF322712  | 3-hydroxybutyrate dehydrogenase (heart, mitochondrial)                                                                         |
| 1442537_at   | -3.4 | BB771206  | Adult male aorta and vein cDNA, RIKEN full-length enriched library, clone:A530016B22 product:unknown EST, full insert sequence |
| 1419131_at   | -3.4 | NM_031164 | coagulation factor XIII, beta subunit                                                                                          |



|              |      |           |                                                                                           |
|--------------|------|-----------|-------------------------------------------------------------------------------------------|
| 1418668_at   | -3.4 | NM_054094 | butyryl Coenzyme A synthetase 1                                                           |
| 1453724_a_at | -3.3 | AK012411  | serine (or cysteine) proteinase inhibitor, clade F, member 1                              |
| 1418664_at   | -3.3 | AK019164  | multiple PDZ domain protein                                                               |
| 1418547_at   | -3.3 | NM_009364 | tissue factor pathway inhibitor 2                                                         |
| 1435888_at   | -3.3 | AV369812  | RIKEN cDNA 9030024J15 gene                                                                |
| 1451530_at   | -3.3 | U03425    | epidermal growth factor receptor                                                          |
| 1450133_at   | -3.3 | NM_028094 | RIKEN cDNA 2010321J07 gene                                                                |
| 1427472_a_at | -3.3 | BC022129  | complement component 8, beta subunit                                                      |
| 1416168_at   | -3.3 | NM_011340 | serine (or cysteine) proteinase inhibitor, clade F, member 1                              |
| 1460722_at   | -3.3 | BC025931  | sterol O-acyltransferase 2                                                                |
| 1457403_at   | -3.2 | AV378018  | ESTs                                                                                      |
| 1427369_at   | -3.2 | BB071996  | NACHT, leucine rich repeat and PYD containing 6                                           |
| 1451675_a_at | -3.2 | M63244    | aminolevulinic acid synthase 2, erythroid                                                 |
| 1438359_at   | -3.2 | AV066542  | RIKEN cDNA 2010003K15 gene                                                                |
| 1418113_at   | -3.2 | BC010989  | cytochrome P450, family 2, subfamily d, polypeptide 10                                    |
| 1456642_x_at | -3.2 | AV295650  | S100 calcium binding protein A10 (calpactin)                                              |
| 1418724_at   | -3.2 | NM_007686 | complement component factor i                                                             |
| 1434906_at   | -3.2 | AI182092  | RIKEN cDNA 0610005C13 gene                                                                |
| 1451760_s_at | -3.2 | BC018406  | expressed sequence AI317395                                                               |
| 1419121_at   | -3.2 | NM_016785 | thiopurine methyltransferase                                                              |
| 1421969_a_at | -3.2 | U82536    | fatty acid amide hydrolase                                                                |
| 1421212_at   | -3.1 | NM_018795 | ATP-binding cassette, sub-family C (CFTR/MRP), member 6                                   |
| 1448927_at   | -3.1 | NM_080465 | potassium intermediate/small conductance calcium-activated channel, subfamily N, member 2 |
| 1427459_at   | -3.1 | BC025836  | RIKEN cDNA 1300018K11 gene                                                                |
| 1440327_at   | -3.1 | AA985897  | expressed sequence AI195470                                                               |
| 1424811_at   | -3.1 | BC024605  | camello-like 5                                                                            |
| 1439934_at   | -3.1 | BB540543  | RIKEN cDNA 130106K10 gene                                                                 |
| 1417232_at   | -3.1 | NM_016675 | claudin 2                                                                                 |
| 1449125_at   | -3.1 | NM_025566 | RIKEN cDNA 2600017J23 gene                                                                |
| 1418037_at   | -3.1 | NM_007576 | complement component 4 binding protein                                                    |
| 1428338_at   | -3.0 | AK019166  | RIKEN cDNA 2610039E05 gene                                                                |
| 1418519_at   | -3.0 | BC012637  | aminoadipate aminotransferase                                                             |
| 1431916_at   | -3.0 | AK018558  | RIKEN cDNA 9030618K22 gene                                                                |

|              |      |           |                                                                                                               |
|--------------|------|-----------|---------------------------------------------------------------------------------------------------------------|
| 1451361_a_at | -3.0 | BC027342  | cDNA sequence BC027342                                                                                        |
| 1416968_a_at | -3.0 | NM_133943 | hydroxy-delta-5-steroid dehydrogenase, 3 beta- and steroid delta-isomerase 7                                  |
| 1435691_at   | -3.0 | BB209207  | ES cells cDNA, RIKEN full-length enriched library, clone:C330021102 product:unknown EST, full insert sequence |
| 1423271_at   | -3.0 | AV239646  | gap junction membrane channel protein beta 2                                                                  |
| 1424273_at   | -3.0 | BC025822  | cytochrome P450, family 2, subfamily c, polypeptide 70                                                        |
| 1448898_at   | -3.0 | AF128196  | chemokine (C-C motif) ligand 9                                                                                |
| 1419400_at   | -2.9 | AW553649  | microsomal triglyceride transfer protein                                                                      |
| 1417936_at   | -2.9 | AF128196  | small inducible cytokine A9                                                                                   |
| 1417835_at   | -2.9 | NM_008645 | murinoglobulin 1                                                                                              |
| 1418282_x_at | -2.9 | NM_009244 | serine protease inhibitor 1-2 (Spi-2)                                                                         |
| 1419677_at   | -2.9 | NM_008555 | mannan-binding lectin serine protease 1                                                                       |
| 1456981_at   | -2.9 | BB428982  | transmembrane channel-like gene family 7                                                                      |
| 1427711_a_at | -2.9 | X15351    | CEA-related cell adhesion molecule 1                                                                          |
| 1432282_a_at | -2.9 | AK008522  | RIKEN cDNA 2010305C02 gene                                                                                    |
| 1459030_at   | -2.9 | AI874739  | expressed sequence AI874739                                                                                   |
| 1451513_x_at | -2.9 | BC012874  | serine (or cysteine) proteinase inhibitor, clade A, member 1b                                                 |
| 1434606_at   | -2.9 | BF140685  | V-erb-b2 erythroblastic leukemia viral oncogene homolog 3 (avian)                                             |
| 1425107_a_at | -2.8 | D17444    | leukemia inhibitory factor receptor                                                                           |
| 1426706_s_at | -2.8 | BB431728  | xylulokinase homolog (H. influenzae)                                                                          |
| 1418787_at   | -2.8 | NM_010776 | mannose binding lectin, serum (C)                                                                             |
| 1453259_at   | -2.8 | BB667513  | RIKEN cDNA 3830422K02 gene                                                                                    |
| 1426223_at   | -2.8 | BC020021  | RIKEN cDNA 2810439F02 gene                                                                                    |
| 1455084_x_at | -2.8 | BB758291  | serine hydroxymethyl transferase 2 (mitochondrial)                                                            |
| 1425675_s_at | -2.8 | M77196    | CEA-related cell adhesion molecule 1                                                                          |
| 1433855_at   | -2.8 | BF462185  | 4-aminobutyrate aminotransferase                                                                              |
| 1425538_x_at | -2.7 | BC016891  | CEA-related cell adhesion molecule 1                                                                          |
| 1453043_at   | -2.7 | AK002603  | RIKEN cDNA 0610012H03 gene                                                                                    |
| 1417203_at   | -2.7 | BC010592  | ethylmalonic encephalopathy 1                                                                                 |
| 1427630_x_at | -2.7 | X67278    | CEA-related cell adhesion molecule 1                                                                          |
| 1426663_s_at | -2.7 | BC024519  | RIKEN cDNA 2210413P12 gene                                                                                    |
| 1419399_at   | -2.7 | AW553649  | microsomal triglyceride transfer protein                                                                      |
| 1422183_a_at | -2.7 | NM_007416 | adrenergic receptor, alpha 1b                                                                                 |

|              |      |           |                                                                                |
|--------------|------|-----------|--------------------------------------------------------------------------------|
| 1426664_x_at | -2.7 | BC024519  | RIKEN cDNA 2210413P12 gene                                                     |
| 1418069_at   | -2.7 | NM_009695 | apolipoprotein C-II                                                            |
| 1450494_x_at | -2.7 | NM_011926 | CEA-related cell adhesion molecule 1                                           |
| 1418352_at   | -2.7 | BC012682  | hydroxysteroid (17-beta) dehydrogenase 2                                       |
| 1426423_at   | -2.7 | BM222403  | serine hydroxymethyl transferase 2 (mitochondrial)                             |
| 1448426_at   | -2.7 | BI217574  | sarcosine dehydrogenase                                                        |
| 1416662_at   | -2.7 | BI217574  | sarcosine dehydrogenase                                                        |
| 1416893_at   | -2.6 | BC021353  | RIKEN cDNA 3110001A13 gene                                                     |
| 1452532_x_at | -2.6 | M61907    | CEA-related cell adhesion molecule 1                                           |
| 1420515_a_at | -2.6 | NM_021319 | peptidoglycan recognition protein 2                                            |
| 1430896_s_at | -2.5 | AK008824  | nudix (nucleoside diphosphate linked moiety X)-type motif 7                    |
| 1431609_a_at | -2.5 | AK008391  | acid phosphatase 5, tartrate resistant                                         |
| 1431302_a_at | -2.5 | AK011172  | nudix (nucleoside diphosphate linked moiety X)-type motif 7                    |
| 1429254_at   | -2.5 | BF472491  | aquaporin 11                                                                   |
| 1459994_x_at | -2.4 | AV027486  | transferrin receptor 2                                                         |
| 1420493_a_at | -2.4 | NM_024229 | phosphate cytidylyltransferase 2, ethanolamine                                 |
| 1448813_at   | -2.4 | NM_023383 | arylacetamide deacetylase (esterase)                                           |
| 1419525_at   | -2.4 | NM_007608 | carbonic anhydrase 5a, mitochondrial                                           |
| 1454649_at   | -2.4 | AV003635  | RIKEN cDNA 4930435F02 gene                                                     |
| 1460682_s_at | -2.3 | BC024320  | CEA-related cell adhesion molecule 2                                           |
| 1428851_at   | -2.3 | AK005003  | RIKEN cDNA 1300014I06 gene                                                     |
| 1425381_a_at | -2.3 | BC013654  | transferrin receptor 2                                                         |
| 1418808_at   | -2.3 | NM_134006 | retinol dehydrogenase 5                                                        |
| 1418836_at   | -2.3 | AI195046  | quinolinate phosphoribosyltransferase                                          |
| 1460681_at   | -2.3 | BC024320  | CEA-related cell adhesion molecule 2                                           |
| 1418365_at   | -2.3 | NM_007801 | cathepsin H                                                                    |
| 1434520_at   | -2.3 | AU067703  | sterol-C5-desaturase (fungal ERG3, delta-5-desaturase) homolog (S. cerevisiae) |
| 1419578_at   | -2.2 | NM_010775 | mannose binding lectin, liver (A)                                              |
| 1418172_at   | -2.2 | AF117613  | heme binding protein 1                                                         |
| 1437654_at   | -2.2 | BE630700  | RIKEN cDNA 3110001K24 gene                                                     |
| 1427214_at   | -2.2 | AK017155  | agmatine ureohydrolase (agmatinase)                                            |
| 1428151_x_at | -2.2 | AK008165  | cysteine conjugate-beta lyase                                                  |
| 1448854_s_at | -2.2 | NM_008645 | murinoglobulin 1 /// murinoglobulin 4 /// murinoglobulin, pseudogene           |

|              |      |          |                               |
|--------------|------|----------|-------------------------------|
|              |      |          | 1 /// murinoglobulin 2        |
| 1452678_a_at | -2.1 | AK008165 | cysteine conjugate-beta lyase |

RNA from control (FLOX) or hepatic HNF4 $\alpha$ -null (H4LivKO) mice liver (n = 3) were hybridized onto Affymetrix oligonucleotide arrays and quantified. The average fold change (2<sup>n</sup>-fold) is expressed relative to FLOX mice. A gene was classified as down-regulated if the following two criteria were met: 1) the corresponding ratio was less than 2<sup>-2</sup>; and 2) the average difference of gene in Flox mice liver was greater than 100. Using the Mann-Whitney ranking feature of the Affymetrix software as criteria for statistical significance, we identified 256 probe sets (208 genes) as decreased in H4LivKO mice liver.

**Supplemental Table 3** Genes Up- regulated in hepatic HNF4 $\alpha$ -null (H4LivKO) mice liver

| Probe set    | fold change (2 <sup>n</sup> ) | Accession No. | Description                                                                                 |
|--------------|-------------------------------|---------------|---------------------------------------------------------------------------------------------|
| 1443147_at   | 9.4                           | BB505010      | ESTs                                                                                        |
| 1416055_at   | 8.0                           | NM_009669     | amylase 2, pancreatic                                                                       |
| 1420447_at   | 7.9                           | NM_023135     | sulfotransferase family 1E, member 1                                                        |
| 1419528_at   | 7.3                           | NM_009286     | sulfotransferase family 2A, dehydroepiandrosterone (DHEA)-preferring, member 2              |
| 1418095_at   | 7.1                           | NM_025357     | small muscle protein, X-linked                                                              |
| 1419491_at   | 6.9                           | BC024380      | defensin beta 1                                                                             |
| 1449525_at   | 6.4                           | NM_008030     | flavin containing monooxygenase 3                                                           |
| 1418654_at   | 6.3                           | NM_019545     | hydroxyacid oxidase (glycolate oxidase) 3                                                   |
| 1422925_s_at | 6.3                           | NM_134246     | peroxisomal acyl-CoA thioesterase 2A                                                        |
| 1419590_at   | 6.2                           | NM_010000     | cytochrome P450, family 2, subfamily b, polypeptide 9                                       |
| 1425752_at   | 5.8                           | AJ132857      | cDNA sequence BC014805                                                                      |
| 1458442_at   | 5.4                           | AI266897      | expressed sequence AI132709                                                                 |
| 1424524_at   | 5.3                           | BC021433      | RIKEN cDNA 1200002N14 gene                                                                  |
| 1419492_s_at | 5.3                           | BC024380      | defensin beta 1                                                                             |
| 1434897_a_at | 5.1                           | AV327862      | solute carrier family 25 (mitochondrial carrier, adenine nucleotide translocator), member 4 |
| 1434465_x_at | 5.0                           | AV333363      | very low density lipoprotein receptor                                                       |
| 1417900_a_at | 4.9                           | NM_013703     | very low density lipoprotein receptor                                                       |
| 1418989_at   | 4.8                           | NM_007799     | cathepsin E                                                                                 |
| 1452913_at   | 4.8                           | AV337888      | Purkinje cell protein 4-like 1                                                              |
| 1424562_a_at | 4.8                           | BC026925      | solute carrier family 25 (mitochondrial carrier, adenine nucleotide translocator), member 4 |
| 1417273_at   | 4.7                           | NM_013743     | pyruvate dehydrogenase kinase, isoenzyme 4                                                  |
| 1436991_x_at | 4.6                           | AV025559      | gelsolin                                                                                    |
| 1425751_at   | 4.6                           | AJ132857      | cDNA sequence BC014805                                                                      |
| 1419748_at   | 4.6                           | NM_011994     | ATP-binding cassette, sub-family D (ALD), member 2                                          |
| 1455069_x_at | 4.5                           | BF225398      | solute carrier family 25 (mitochondrial carrier, adenine nucleotide translocator), member 4 |
| 1437171_x_at | 4.5                           | AV025667      | gelsolin                                                                                    |
| 1430584_s_at | 4.4                           | BB213876      | carbonic anhydrase 3                                                                        |
| 1448975_s_at | 4.4                           | NM_031192     | renin 1 structural                                                                          |

|              |     |           |                                                                             |
|--------------|-----|-----------|-----------------------------------------------------------------------------|
| 1453588_at   | 4.3 | BB213876  | carbonic anhydrase 3                                                        |
| 1421425_a_at | 4.3 | NM_030598 | Down syndrome critical region gene 1-like 1                                 |
| 1425273_s_at | 4.3 | AF083876  | epithelial membrane protein 2                                               |
| 1415812_at   | 4.3 | NM_010354 | gelsolin                                                                    |
| 1456312_x_at | 4.3 | AV224521  | gelsolin                                                                    |
| 1425644_at   | 4.1 | U42467    | leptin receptor                                                             |
| 1425875_a_at | 4.1 | U58862    | leptin receptor                                                             |
| 1438431_at   | 4.1 | BB197269  | expressed sequence AL024097                                                 |
| 1432944_at   | 4.0 | AK013658  | RIKEN cDNA 2900046L07 gene                                                  |
| 1450971_at   | 4.0 | AK010420  | growth arrest and DNA-damage-inducible 45 beta                              |
| 1415997_at   | 4.0 | AF173681  | thioredoxin interacting protein                                             |
| 1441891_x_at | 3.9 | BB338945  | ELOVL family member 7, elongation of long chain fatty acids (yeast)         |
| 1426622_a_at | 3.9 | BB150720  | glutaminy-peptide cyclotransferase (glutaminy cyclase)                      |
| 1456156_at   | 3.9 | BM124366  | ESTs                                                                        |
| 1450883_a_at | 3.7 | BB534670  | CD36 antigen                                                                |
| 1424959_at   | 3.5 | BC013521  | annexin A13                                                                 |
| 1449773_s_at | 3.5 | AI323528  | growth arrest and DNA-damage-inducible 45 beta                              |
| 1421681_at   | 3.5 | NM_032002 | neuregulin 4                                                                |
| 1423166_at   | 3.5 | BB534670  | CD36 antigen                                                                |
| 1419700_a_at | 3.4 | NM_008935 | prominin 1                                                                  |
| 1422997_s_at | 3.4 | NM_134188 | mitochondrial acyl-CoA thioesterase 1 /// cytosolic acyl-CoA thioesterase 1 |
| 1415996_at   | 3.4 | AF173681  | thioredoxin interacting protein                                             |
| 1451064_a_at | 3.4 | BC004827  | phosphoserine aminotransferase 1                                            |
| 1450884_at   | 3.3 | BB534670  | CD36 antigen                                                                |
| 1427473_at   | 3.3 | J03953    | glutathione S-transferase, mu 3                                             |
| 1449065_at   | 3.3 | NM_012006 | cytosolic acyl-CoA thioesterase 1                                           |
| 1451798_at   | 3.2 | M57525    | interleukin 1 receptor antagonist                                           |
| 1450243_a_at | 3.2 | NM_030598 | Down syndrome critical region gene 1-like 1                                 |
| 1429123_at   | 3.1 | BB025283  | RAB27A, member RAS oncogene family                                          |
| 1425272_at   | 3.1 | AF083876  | epithelial membrane protein 2                                               |
| 1427063_at   | 3.0 | AK017241  | RIKEN cDNA 5330417C22 gene                                                  |
| 1418780_at   | 3.0 | NM_018887 | cytochrome P450, family 39, subfamily a, polypeptide 1                      |
| 1422811_at   | 2.9 | NM_011977 | solute carrier family 27 (fatty acid transporter), member 1                 |

|              |     |           |                                                                     |
|--------------|-----|-----------|---------------------------------------------------------------------|
| 1427474_s_at | 2.9 | J03953    | glutathione S-transferase, mu 3                                     |
| 1458176_at   | 2.9 | BB021263  | period homolog 3 (Drosophila)                                       |
| 1446423_at   | 2.9 | BB479853  | ESTs                                                                |
| 1440840_at   | 2.8 | BB335455  | RIKEN cDNA D630004K10 gene                                          |
| 1421430_at   | 2.8 | NM_009014 | RAD51-like 1 (S. cerevisiae)                                        |
| 1438617_at   | 2.8 | BB222737  | ESTs                                                                |
| 1428626_at   | 2.8 | AK008800  | RIKEN cDNA 2210402C18 gene                                          |
| 1418191_at   | 2.8 | NM_011909 | ubiquitin specific protease 18                                      |
| 1433670_at   | 2.8 | BE571790  | epithelial membrane protein 2                                       |
| 1423555_a_at | 2.8 | BB329808  | interferon-induced protein 44                                       |
| 1415958_at   | 2.8 | AB008453  | solute carrier family 2 (facilitated glucose transporter), member 4 |
| 1418328_at   | 2.7 | AF017174  | carnitine palmitoyltransferase 1b, muscle                           |
| 1417101_at   | 2.6 | BC004714  | heat shock protein 2                                                |
| 1456226_x_at | 2.6 | BB234940  | discoïdin domain receptor family, member 1                          |
| 1419759_at   | 2.5 | M30697    | ATP-binding cassette, sub-family B (MDR/TAP), member 1A             |
| 1425109_at   | 2.4 | BC025548  | cDNA sequence BC010552                                              |

RNA from control (FLOX) or hepatic HNF4 $\alpha$ -null (H4LivKO) mice liver (n = 3) were hybridized onto Affymetrix oligonucleotide arrays and quantified. The average fold change (2<sup>n</sup>-fold) is expressed relative to FLOX mice. A gene was classified as up-regulated if the following two criteria were met: 1) the corresponding ratio was greater than 2<sup>2</sup>; and 2) the average difference of gene in H4LivKO mice liver was greater than 100. Using the Mann-Whitney ranking feature of the Affymetrix software as criteria for statistical significance, we identified 77 probe sets (58 genes) as increased in H4LivKO mice liver.

**Supplementary Figure 1.** HNF4 $\alpha$  regulates the Dio1 gene expression in human. (A) siRNA-mediated knockdown of HNF4 $\alpha$ . The duplexes of each siRNA, targeting HNF4 $\alpha$  mRNA (si-HNF4 $\alpha$  (i); target sequences of 5'-GGCAGUGCGUGGUGGACAAAdTdT-3' and 5'-UUGUCCACCACGCACUGCCdGdG-3', si-HNF4 $\alpha$  (ii); target sequences of 5'-AGAGAUCCAUGGUGUCCAAdTdT-3' and 5'-UUGAACACCAUGGAUCUCUdTdG) and negative control (non-silencing siRNA) (si-cont; 5'-UUCUCCGAACGUGUCACGUdTdT-3' and 5'-ACGUGACACGUUCGGAGAAAdTdT-3') were purchased from Qiagen (Valencia, CA) as previously described (1). HepG2 cells were plated on day 0 at a density of  $5 \times 10^5$  cells/6-well plates. On day 1, cells were transfected with HNF4 $\alpha$ -specific (si-HNF4 $\alpha$  (i) or (ii)) or control siRNA (si-cont), at final concentration of 100 nM using Lipofectamine 2000 reagent. On day 3, the cells were harvested for RNA as well as for protein. Total RNA was reverse-transcribed and subjected to QRT-PCR with specific primers for HNF4 $\alpha$  (top). Cyclophilin was used as the invariant control. Values represent the amount of mRNA relative to that in the control group, which is arbitrarily defined as 1. Each value represents mean  $\pm$  S.D. of triplicate experiments. \*,  $P < 0.01$  compared with control. 5  $\mu$ g of protein were subjected to SDS-PAGE and immunoblot analysis using either anti-HNF4 $\alpha$  (IgG-H1415) or  $\beta$ -actin antibody (bottom). (B and C) Effect of HNF4 $\alpha$  on the levels of Dio1 transcripts in HepG2 cells. Total RNA was reverse-transcribed and subjected to QRT-PCR with specific primers for Dio1 (B). Cell lysates from HepG2 cells were prepared and Dio1 activities were determined using rT<sub>3</sub> as substrate (C). Each bar represents means  $\pm$  SD. \*  $P < 0.01$  compared with control. (D) ChIP assays for HNF4 $\alpha$  association with the human Dio1 promoter. Crosslinked DNA-protein complexes from HepG2 cells extracts were immunoprecipitated with anti-HNF4 $\alpha$  antibody, or control IgG, followed by PCR amplification with specific primers as schematically depicted in the diagram. Genomic DNA in the input cell lysates was used as a positive control.

## REFERENCES

1. Sumi, K., T. Tanaka, A. Uchida, K. Magoori, Y. Urashima, R. Ohashi, H. Ohguchi, M. Okamura, H. Kudo, K. Daigo, T. Maejima, N. Kojima, I. Sakakibara, S. Jiang, G. Hasegawa, I. Kim, T. F. Osborne, M. Naito, F. J. Gonzalez, T. Hamakubo, T. Kodama, and J. Sakai. 2007. Cooperative interaction between hepatocyte nuclear factor 4 alpha and GATA transcription factors regulates ATP-binding cassette sterol transporters ABCG5 and ABCG8. *Mol Cell Biol* **27**:4248-60.
