# Supplementary material
Source: PubMed Central journal article supplement (PMC2423126)

## Supplemental figure 1

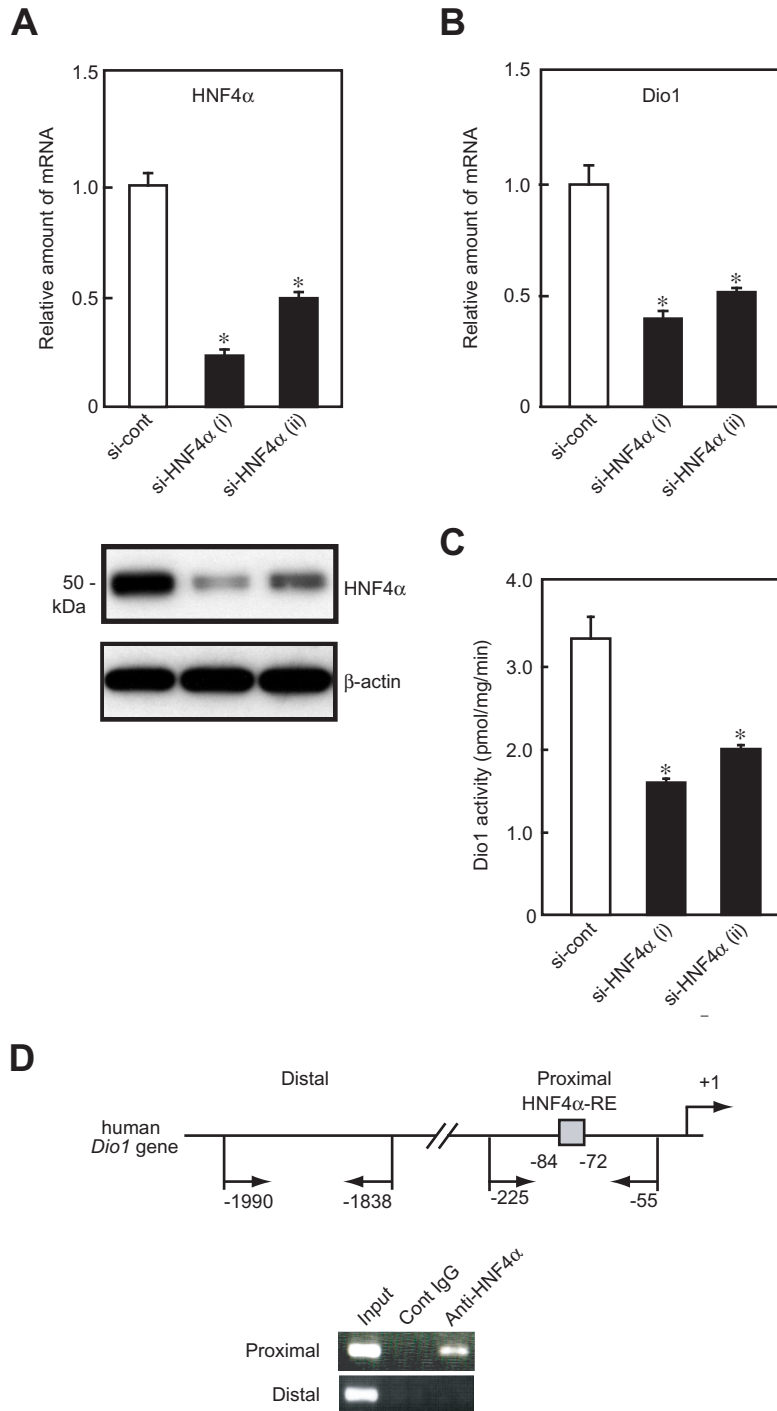

Supplement: supp_28_12_3917__2.pdf [file supp_28_12_3917__2.pdf]
